# Supplementary material for: Yttrium iodide and bis(trimethylsilyl)methyl complexes of the chelating diamide [ArN(CH2)3NAr]2− (Ar = 2,6-iPr2C6H3)
Source: Royal Society of Chemistry journal article supplement (doi:10.1039/b203757b), 2002-01-01
Supplement: b203757b.doc [file b203757b.doc]

# Yttrium Iodide and Bis-trimethylsilyl-methyl Complexes of the Chelating Diamide [ArN(CH2)3NAr]2- (Ar = 2,6-iPr2C6H3)

## F. Geoffrey N. Cloke, Benjamin R. Elvidge, Peter B. Hitchcock and Vanessa M. E. Lamarche

# Supporting Information

### Synthesis of YI3

YI3 was prepared by a variation of the literature method.[[1]](#endnote-2)

A thick-walled, double constriction ampoule was charged with Y chips (1g, 11.25mmol) and excess HgI2 (25g, 55mmol) and dried *in vacuo* (10-6 mbar) for 2h. The ampoule was then sealed under vacuum and heated to 315oC for 48h. The excess HgI2 and evolved Hg were removed by sublimation within the sealed tube over a further 48h. The tube was opened in a glove box and the contents placed in a tantalum boat within a quartz tube, which was heated to 390oC at 10-6 mbar for 4h to remove trace HgI2 and Hg. YI3 was collected as an off-white powder in approximately 100% yield.

### Synthesis of ArNH(CH2)3NHAr (Ar = 2,6-iPr2C6H3)

This preparation can be found in the literature.[[2]](#endnote-3)

n-BuLi (2.50M, 79.2mL, 198mmol) was added dropwise to a stirring THF (150mL) solution of 2,6-diisopropylaniline (35.12g, 198.1mmol, distilled and stored over molecular sieves) at –78oC. The solution was warmed to room temperature and stirred for 30 min. The solution was cooled to 0oC and tmeda (23.0g, 198mmol) was added dropwise followed by 1,3-dibromopropane (20.0g, 99.1mmol) dropwise. The solution was warmed to room temperature and stirred overnight. The solution was poured onto H2O (100mL) and extracted with CH2Cl2 (3 x 100mL). The organic layer was dried over anhydrous Na2SO4 and the volatiles removed *in vacuo*. The resulting yellow oil was dissolved in diethyl ether (30mL) and concentrated HCl (20mL) was added. The resulting salt ([ArH2N(CH2)3NH2Ar]Cl2) was removed by filtration, washed with diethyl ether (20mL) and dissolved in dichloromethane. This solution was poured into aqueous saturated NaHCO3 (100mL). The organic layer was separated and dried over anhydrous Na2SO4. Removal of the solvent yielded ArNH(CH2)3NHAr as a viscous oil (24.05g, 61mmol, 61.5%).

**1H NMR** (C6D6):  7.10 (s, 6H, Ar),  3.36 (sept, 4H, C*H*Me2),  3.01 (t, 4H, NC*H*2),  1.77 (t, 2H, NCH2C*H*2CH2N),  1.22 (d, 24H, CH*Me2*)

**13C{1H} NMR** (C6D6):  142.7, 124.6, 124.0, 123.1, 50.7, 28.1, 24.5, 22.5

### Synthesis of Potassium Menthoxide

A 3L round-bottomed flask with reflux sidearm was charged with potassium (40.1g, 1mol), menthol (128.3g, 0.821mol) and heptane (1.5L). The mixture was degassed under argon, a stillhead fitted, and the mixture heated to reflux for 24h. On cooling the reaction mixture yielded a pale yellow solution, copious white precipitate and 2-3g potassium. This mixture was filtered at room temperature to yield the product as a clear, very pale yellow solution. A 2mL aliquot was quenched with deionised water and titrated against hydrochloric acid using a phenolphthalein indicator to determine the molarity of the solution, which was then stored at –20 oC.

### Synthesis of K2[ArN(CH2)3NAr] (Ar = 2,6-iPr2C6H3)

ArNH(CH2)3NHAr (2.01g, 5.097mmol) was dissolved in 20mL 40:60 petroleum-ether and dried over anhydrous sodium sulphate. The solution was filtered into a pre-weighed Schlenk and the volatiles removed *in vacuo*. The resultant oil was dissolved in 60ml hexanes and cooled to –50 oC. nBuLi (4.08ml, 10.19mmol) was added dropwise over 15 minutes with stirring, then stirred for a further 1h at room temperature. The pale yellow solution was then cooled to –30 oC and potassium menthoxide (20.30ml, 10.19mmol) was added dropwise over 30 minutes with stirring. A bright yellow precipitate was observed almost immediately, and the suspension was stirred overnight. The suspension was filtered onto a glass frit in the glove box, and washed with 3x20ml hexanes. The residue was dried on the frit for 2.5h and then collected as a bright yellow powder in 88% yield.

**1H NMR** (C6D6):  7.11 (m, 6H, Ar),  3.36 (sept, 4H, C*H*Me2),  3.01 (t, 4H, NC*H*2),  1.76 (t, 2H, NCH2C*H*2CH2N),  1.22 (d, 24H, CH*Me2*)

**7Li NMR** (C6D6): no resonances observed

### Synthesis of {Y[ArN(CH2)3NAr] I(THF)2}

YI3 (0.235g, 0.5mmol) and ArNK(CH2)3NKAr (0.235g, 0.5mmol) were dissolved in THF (40mL, 0oC). The resultant yellow suspension, on stirring, rapidly turned to a white suspension, which was stirred overnight at room temperature. The solvent was removed in *vacuo* from the resultant pale yellow suspension and the residue dried *in vacuo* for 1h. Toluene (40mL) was added, and the suspension filtered to yield a clear, pale yellow solution. The solvent was reduced in volume and the solution cooled to –45 oC to yield the product as colourless crystals in 20% yield.

**1H NMR** (C6D6): δ 7.08 (m, 6H, C6*H*3(C3H7)2); 4.17 (sept, 4H, C*H*(CH3)2); 3.74 (t, 4H, NC*H*2CH2C*H*2N); 3.25 (s, 8H, OC*H*2CH2CH2C*H*2); 3.96 (m, 2H, NCH2C*H*2CH2N); 1.41 (d, 24H, CH(C*H*3)2); 0.98 (s, 8H, OCH2C*H*2C*H*2CH2).

**Elemental analysis** for YC35H56N2O2I: calculated: C: 55.85%, H: 7.50%, N: 3.72%; found: C: 55.25%, H: 7.50%, N: 3.71%; 1H NMR

### Synthesis of {Y[ArN(CH2)3NAr] R(THF)}

{[ArN(CH2)3NAr]YI(THF)2} (0.200g, 0.26mmol) and KCH(SiMe3)2 (0.053g, 0.26mmol) were dissolved in benzene (40mL, 20 oC). The resultant yellow solution was stirred overnight at room temperature. The solvent was removed in *vacuo* from the resultant pale yellow suspension and the residue dried *in vacuo* for 1h. Pentane (30mL) was added, and the suspension filtered to yield a clear, pale yellow solution. The solution was cooled to –45 oC to yield the product as colourless crystals in 22% yield.

**1H NMR** (C6D6 with added C4D8O): δ 7.20 (m, 6H, C6H3(C3H7)2); 3.77 (s, 4H, CH(CH3)2); 3.58 (m, 8H, NCH2CH2CH2N and OCH2CH2CH2CH2); 2.33 (m, 2H, NCH2CH2CH2N); 1.42 (m, 28H, CH(CH3)2 and OCH2CH2CH2CH2); 0.06 (s, 18H, SiMe3); -1.09 (d, 2JYH = 2.2 Hz 1H, CH(SiMe3)2;).

**{1H}13C NMR** (C6D6): δ 36.5 (d, 1JYC = 35 Hz)

**Elemental analysis** for YC38H67N2OSi2: calculated: C: 64.01%, H: 9.47%, N: 3.93%; found: C: 63.89%, H: 9.11%, N: 4.29%

1. F. T. Edelmann, in *Synthetic Methods of Organometallic and Inorganic Chemistry, Vol. 6* (Eds.: G. Brauer, W. A. Herrmann), Georg Thieme Verlag, Stuttgart, 1997. [↑](#endnote-ref-2)
2. J. D. Scollard, D. H. McConville, J. J. Vittal, *Organometallics*, 1997, **16**, 4415-4420. [↑](#endnote-ref-3)
